# Supplementary material
Source: PubMed Central journal article supplement (PMC2853951)

Supplementary Material S4. Shi, P.

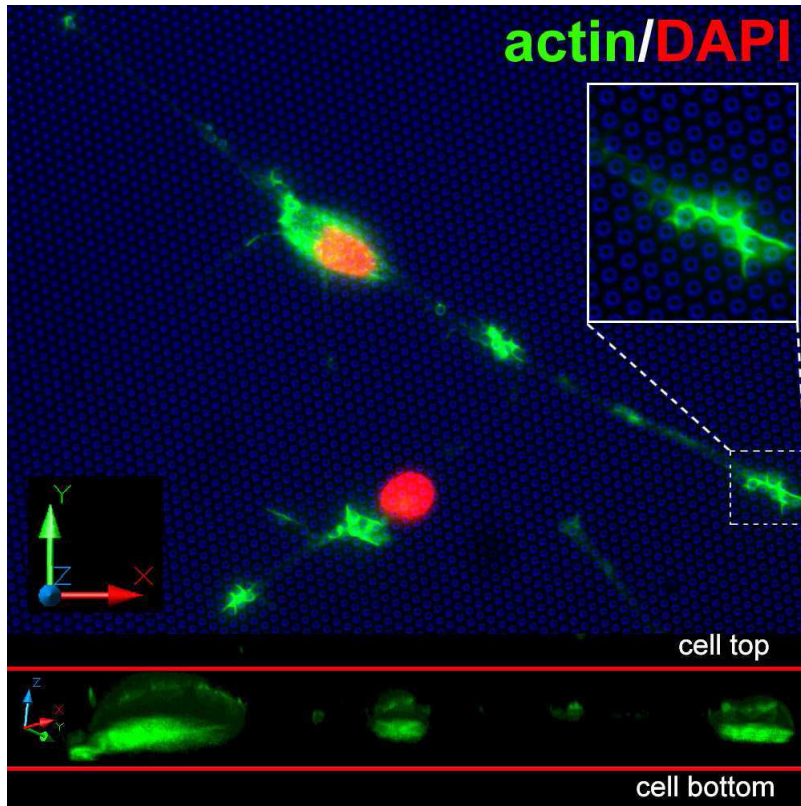

Supplement: NIHMS185551-supplement-Supplementary_Material_4.pdf [file NIHMS185551-supplement-Supplementary_Material_4.pdf]
